# Supplementary material for: Yield of Clinical Screening for Hypertrophic Cardiomyopathy in Child First-Degree Relatives: Evidence for a Change in Paradigm
Source: PubMed Central journal article supplement (PMC6636798; doi:10.1161/circulationaha.118.038846), 2019-04-22
Supplement: cir-140-184-s001.pdf [file cir-140-184-s001.pdf]

## SUPPLEMENTAL MATERIAL

**Supplementary Figure 1: Number of patients undergoing clinical screening by year**

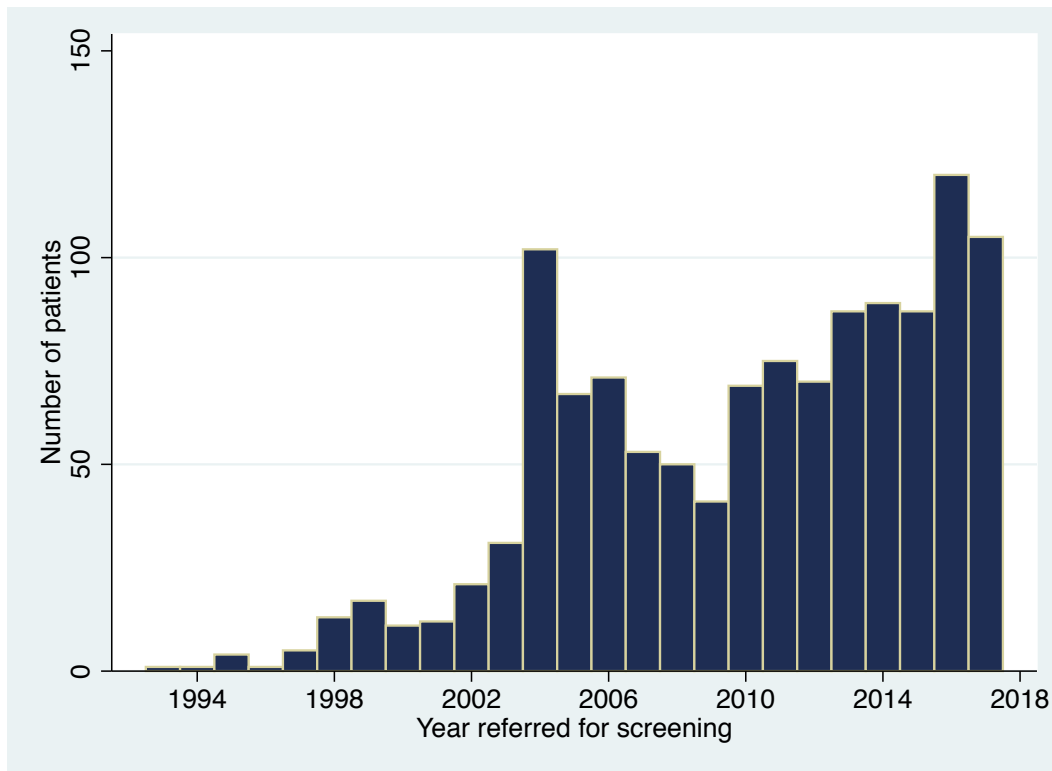

**Supplementary figure 2: Result of genetic testing in patients with a diagnosis of HCM by era of diagnosis**

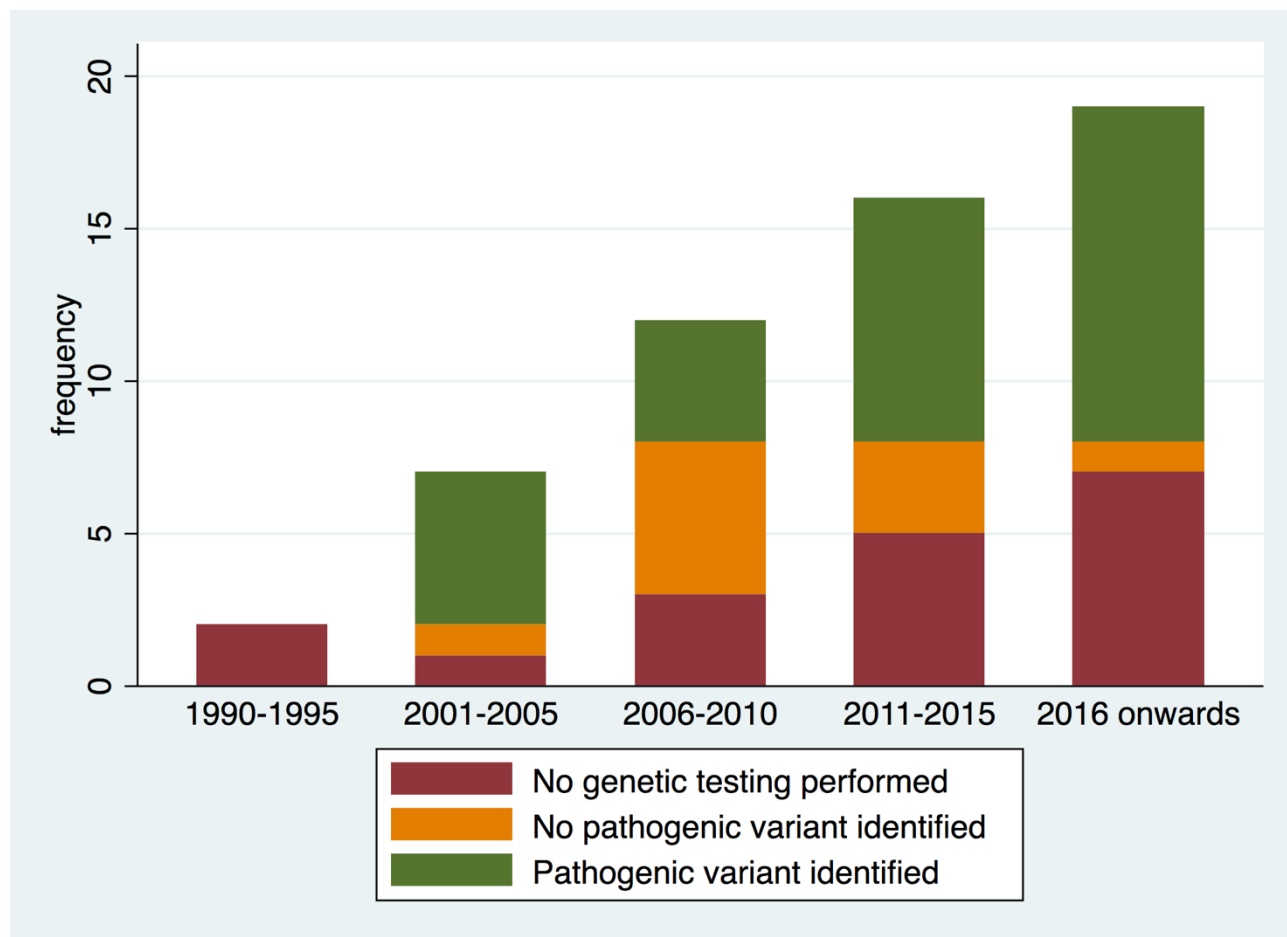

**Supplementary table 1: Re-classification of reported variants according to ACMG classification guidance.**

| <b>Gene</b>  | <b>Protein change</b>  | <b>Nucleotide change</b> | <b>Previous pathogenicity classification</b> | <b>ACMG classification</b> |
|--------------|------------------------|--------------------------|----------------------------------------------|----------------------------|
| MYBPC3       | Arg943*                | c.2827C>T                | PATHOGENIC                                   | PATHOGENIC                 |
| TPM1         | Glu192Lys              | c.574G>A                 | PATHOGENIC                                   | LIKELY PATHOGENIC          |
| MYBPC3       |                        | c.3752_3753delAT         | PATHOGENIC                                   | VUS                        |
| MYH7         | Glu374Val              | g.23899001T>A            | PATHOGENIC                                   | VUS                        |
| MYBPC3       | Arg495Gln              | c.1484G>A                | PATHOGENIC                                   | PATHOGENIC                 |
| MYBPC3       |                        | c.927-9G>A               | PATHOGENIC                                   | PATHOGENIC                 |
| PRKAG2       | Asn247Ile              |                          | PATHOGENIC                                   | VUS                        |
| MYH7         | Arg723Gly              | c.2167C>G                | PATHOGENIC                                   | PATHOGENIC                 |
| MYL2         | Gly87Ala               | c.260G>C                 | PATHOGENIC                                   | VUS                        |
| TNNT2        | Glu163del              | c.487_489delGAG          | PATHOGENIC                                   | VUS                        |
| MYBPC3       |                        | 1928-2A>G                | PATHOGENIC                                   | PATHOGENIC                 |
| MYBPC3       | Trp792Valfs*41         | c.2373_2374insG          | PATHOGENIC                                   | PATHOGENIC                 |
| TNNI3        | Asp196Asn              | c.586G>A                 | PATHOGENIC                                   | PATHOGENIC                 |
| TNNI3 +DES   | Lys206Gln<br>Leu470Phe | c.616A>C<br>c.1408C>T    | PATHOGENIC<br>VUS                            | PATHOGENIC<br>VUS          |
| TPM1         | Glu192Lys              | c.574G>A                 | PATHOGENIC                                   | LIKELY PATHOGENIC          |
| MYH7         | Phe247Leu              | c.739T>C                 | PATHOGENIC                                   | VUS                        |
| MYH7 + FHOD3 | Asn696Ser<br>Arg638Trp | c.2087A>G<br>Arg638Trp   | PATHOGENIC<br>VUS                            | LIKELY PATHOGENIC<br>VUS   |
| MYH7         | Glu374Lys              | g.23899001T>A            | PATHOGENIC                                   | VUS                        |
| TNNT2        | Arg92Gln               | c.275G>A                 | PATHOGENIC                                   | PATHOGENIC                 |
| MYBPC3       |                        | c.3491-2A>T              | PATHOGENIC                                   | PATHOGENIC                 |
| MYBPC3       | Lys505*                | c.1513A>T                | PATHOGENIC                                   | PATHOGENIC                 |
| MYBPC3       | Glu258Lys              | c.772G>A                 | PATHOGENIC                                   | PATHOGENIC                 |
| MYH7         | Lys847Glu              | c.2539A>G                | PATHOGENIC                                   | PATHOGENIC                 |
| MYBPC3 + PLN | Glu542Gln<br>Ile47fs   | c.1624G>C<br>c.138dupT   | PATHOGENIC<br>VUS                            | PATHOGENIC<br>VUS          |
| MYBPC3       | His390Metfs16          | c.1168delC               | PATHOGENIC                                   | PATHOGENIC                 |
| MYH7         | Met982Thr              | c.2945T>C                | PATHOGENIC                                   | LIKELY BENIGN              |
| MYBPC3       | Arg1138His             | c.3413G>A                | PATHOGENIC                                   | LIKELY BENIGN              |
| MYH7         | Arg721Lys              | c.2162G>A                | PATHOGENIC                                   | LIKELY PATHOGENIC          |
| MYH7         | Thr449Asn              | c.1346C>A                | PATHOGENIC                                   | VUS                        |
| MYBPC3 X2    | Arg802Trp<br>Ser858Asn | c.2573G>A                | PATHOGENIC                                   | VUS<br>VUS                 |

|                    |                            |                         |                   |                      |
|--------------------|----------------------------|-------------------------|-------------------|----------------------|
| MYBPC3             |                            | c.1224-19G>A            | PATHOGENIC        | PATHOGENIC           |
| MYH7               | Gly741Trp                  | c.2221G>T               | PATHOGENIC        | PATHOGENIC           |
| TNNT2              | Asp86Tyr                   | c.256G>T                | PATHOGENIC        | LIKELY<br>PATHOGENIC |
| TNNT2 +<br>MYH7    | Arg278Cys<br>Asp239Asn     | c.832C>T<br>c.715G>A    | PATHOGENIC        | PATHOGENIC<br>VUS    |
| TNNT2              | Arg92Leu                   | c.832C>T                | PATHOGENIC        | PATHOGENIC           |
| MYH7               | Arg453Cys                  | c.1357C>T               | PATHOGENIC        | PATHOGENIC           |
| MYH7               | Glu931del                  | 2791_2793delGAG         | PATHOGENIC        | VUS                  |
| MYH7               | Ala797Thr                  | c.2389G>A               | PATHOGENIC        | PATHOGENIC           |
| MYBPC3 +<br>TNNT2  | Arg502Trp                  | c.1504C>T<br>(c.341C>T) | PATHOGENIC        | PATHOGENIC           |
| MYBPC3 +<br>FLNC   | Leu2421His                 | c.927-2A>G<br>c.7262T>A | PATHOGENIC<br>VUS | PATHOGENIC<br>VUS    |
| MYH7               | Arg442Cys                  | c.1324C>T               | PATHOGENIC        | PATHOGENIC           |
| TNNT2              | Arg148Gln                  | c.443A>G                | PATHOGENIC        | VUS                  |
| MYH7               | Glu927Lys                  | c.2779G>A               | PATHOGENIC        | PATHOGENIC           |
| MYBPC3             | Ser871Glnfs*13             | c.2610_2611insC         | PATHOGENIC        | PATHOGENIC           |
| MYH7               | Leu908Val                  | c.2722C>G               | PATHOGENIC        | PATHOGENIC           |
| MYBPC3             | Arg597Gln                  | c.1790G>A               | PATHOGENIC        | PATHOGENIC           |
| MYBPC3             | Arg502Trp                  | c.1504C>T               | PATHOGENIC        | PATHOGENIC           |
| MYH7               | Arg663His                  | c.1988G>A               | PATHOGENIC        | PATHOGENIC           |
| MYH7               | Leu889His                  | c.2666T>A               | PATHOGENIC        | LIKELY<br>PATHOGENIC |
| MYH7               | Ala335Thr                  | c.1003G>A               | PATHOGENIC        | VUS                  |
| MYBPC3 +<br>TNNT2  | Arg495Gln<br>Arg285Cys     | c.1484G>A<br>c.853G>A   | PATHOGENIC<br>VUS | PATHOGENIC<br>VUS    |
| MYH7 +<br>DES      | Arg453Pro<br>Thr76Profs*22 | c.1358G>C<br>c.226delA  | PATHOGENIC<br>VUS | PATHOGENIC<br>VUS    |
| MYH7               | Asn817Lys                  | c.2451C>A               | PATHOGENIC        | VUS                  |
| MYBPC3             | Glu1085Glyfs*104           | c.3254delA              | PATHOGENIC        | PATHOGENIC           |
| MYH7               | Arg453His                  | c.1358G>A               | PATHOGENIC        | PATHOGENIC           |
| MYH7               | Glu958Lys                  | c.2872G>A               | PATHOGENIC        | VUS                  |
| MYBPC3             | Ser871Alafs*8              | c.2604_2605delTCinsA    | PATHOGENIC        | PATHOGENIC           |
| MYBPC3             | Pro699Glnfs*55             | c2093delC               | PATHOGENIC        | PATHOGENIC           |
| PRKAG2             | Asn488Ile                  | c.1463A>T               | PATHOGENIC        | VUS                  |
| MYH7               | Gly741Arg                  | c.2221G>C               | PATHOGENIC        | PATHOGENIC           |
| MYBPC3             | Val758Ala                  | c.2273C>T               | PATHOGENIC        | LIKELY<br>PATHOGENIC |
| TNNT2              | Arg92Trp                   | c.274C>T                | PATHOGENIC        | PATHOGENIC           |
| TNNT2              | Arg278Cys                  | c.832C>T                | PATHOGENIC        | PATHOGENIC           |
| MYBPC3             | Arg502Gln                  | c.1505G>A               | PATHOGENIC        | PATHOGENIC           |
| MYH7               | Glu965Lys                  | c.2893G>A               | PATHOGENIC        | LIKELY<br>PATHOGENIC |
| MYBPC3 +<br>MYBPC3 | Cys1266Tyr<br>Gly5Arg      | c.3797G>A<br>c.13G>C    | PATHOGENIC<br>VUS | VUS<br>LIKELY BENIGN |
| MYBPC3             | Pro1243Arg                 | c.3728C>G               | PATHOGENIC        | VUS                  |
| MYBPC3             | Tyr333*                    | c.999C>G                | PATHOGENIC        | PATHOGENIC           |
| TNNI3              | Arg162Gln                  | c.485G>A                | PATHOGENIC        | PATHOGENIC           |
| MYBPC3             | Arg495Gly                  | c.1483C>G               | PATHOGENIC        | PATHOGENIC           |
| MYBPC3             |                            | C.927-9G>A              | PATHOGENIC        | PATHOGENIC           |

|                              |                         |                                   |                          |                                              |
|------------------------------|-------------------------|-----------------------------------|--------------------------|----------------------------------------------|
| MYH7                         | Glu924Lys               | c.2770G>A                         | PATHOGENIC               | PATHOGENIC                                   |
| MYH7                         | Tyr624Asn               | c.1870T>A                         | PATHOGENIC               | VUS                                          |
| MYBPC3                       |                         | 1457+5G>C                         | PATHOGENIC               | PATHOGENIC                                   |
| MYBPC3 + FHOD3               | Arg502Trp<br>Arg637Gln  | c.1504C>T                         | PATHOGENIC<br>VUS        | PATHOGENIC<br>VUS                            |
| MYH7                         | Arg403Leu               | 1208G>T                           | PATHOGENIC               | PATHOGENIC                                   |
| MYH7                         | Arg403Gln               | c.1208G>A                         | PATHOGENIC               | PATHOGENIC                                   |
| MYH7                         | Met515Thr               | c.1544T>C                         | PATHOGENIC               | LIKELY<br>PATHOGENIC                         |
| MYBPC3                       | Gln969*                 | c.2905C>T                         | PATHOGENIC               | PATHOGENIC                                   |
| TNNT2                        | Arg92Trp                | c.274C>T                          | PATHOGENIC               | PATHOGENIC                                   |
| MYBPC3                       |                         | c.927-2A>G                        | PATHOGENIC               | PATHOGENIC                                   |
| ACTC1                        | Tyr296Asn               |                                   | PATHOGENIC               | VUS                                          |
| MYBPC3                       | Tyr1251*                | c.886T>A                          | PATHOGENIC               | PATHOGENIC                                   |
| MYBPC3                       |                         | 3190+5G>A                         | PATHOGENIC               | PATHOGENIC                                   |
| MIT1                         | m.4300A>G               |                                   | PATHOGENIC               | VUS                                          |
| MYBPC3                       | Lys685Argfs             | c.2054_2067+11del25               | PATHOGENIC               | PATHOGENIC                                   |
| MYBPC3                       | Asp770Asn               | c.2308G>A                         | PATHOGENIC               | PATHOGENIC                                   |
| MYBPC3 + MYH7                | Arg502Trp<br>Lys1459Asn | c.1504C>T<br>c.4377G>T            | PATHOGENIC<br>VUS        | PATHOGENIC<br>LIKELY BENIGN                  |
| MYH7                         | (Asp900Glu)             | c.2700T>A,                        | PATHOGENIC               | VUS                                          |
| MYH7                         | Arg719Gln               | c.2156 G>A                        | PATHOGENIC               | PATHOGENIC                                   |
| TNNT2                        | Ile79Asn                | c.236T>A                          | PATHOGENIC               | VUS                                          |
| MYBPC3                       |                         | 2326-36Del                        | PATHOGENIC               | PATHOGENIC                                   |
| MYBPC3                       | Trp1098*                | c.3294G>A                         | PATHOGENIC               | PATHOGENIC                                   |
| MYBPC3                       | Pro960Leu               |                                   | PATHOGENIC               | VUS                                          |
| MYH7                         | Val406Met               | c.1216G>A                         | PATHOGENIC               | LIKELY<br>PATHOGENIC                         |
| MYBPC3+<br>MYBPC3 +<br>CSRP3 | Glu165Asp<br>Thr84Met   | 3330+5G>A<br>c.495G>C<br>c.251C>T | PATHOGENIC<br>VUS<br>VUS | PATHOGENIC<br>VUS<br>VUS                     |
| MYBPC3+<br>MYH7              | Asp610Asn<br>Arg787His  | c.1828G>A<br>c.2360G>A            | PATHOGENIC<br>PATHOGENIC | LIKELY<br>PATHOGENIC<br>LIKELY<br>PATHOGENIC |
| TNNI3                        | Arg162Glu               | c.485G>A                          | PATHOGENIC               | PATHOGENIC                                   |
| MYBPC3                       | Pro453Cysfs*21          | c.1357_1358delCC                  | PATHOGENIC               | PATHOGENIC                                   |
| MYBPC3                       |                         | c.927-2A>G                        | PATHOGENIC               | PATHOGENIC                                   |
| MYBPC3                       | Asp1076Valfs*6          | c.3226_3227insT                   | PATHOGENIC               | PATHOGENIC                                   |
| MYH7                         | Arg723Cys               | c.2167C>T                         | PATHOGENIC               | PATHOGENIC                                   |
| MYH7                         | Ala355Ser               | c.1063G>T                         | PATHOGENIC               | PATHOGENIC                                   |
| MYBPC3                       |                         | c.1624+4A>T                       | PATHOGENIC               | PATHOGENIC                                   |
| MYH7                         | Ala463Asp               | c.1388C>A                         | PATHOGENIC               | LIKELY<br>PATHOGENIC                         |
| MYBPC3 + MYL3                | Tyr373*<br>Ala57Asp     | c.170C>A                          | PATHOGENIC               | PATHOGENIC<br>LIKELY<br>PATHOGENIC           |
| MYBPC3                       |                         | c.1457+5G>C                       | PATHOGENIC               | PATHOGENIC                                   |
| MYH7                         | Glu256Glu               | c.767G>A                          | PATHOGENIC               | PATHOGENIC                                   |
| TNNT2                        | Glu183Lys               | c.277G>A                          | PATHOGENIC               | PATHOGENIC                                   |
| MYH7                         | Val606Leu               | c.1816G>T                         | PATHOGENIC               | LIKELY<br>PATHOGENIC                         |

|               |                        |                           |               |                                        |
|---------------|------------------------|---------------------------|---------------|----------------------------------------|
| MYH7          | Asp906Gly              | c.2717A>G                 | VUS           | PATHOGENIC                             |
| MYBPC3        | Lys505del              | c.1513_1515delAAG         | VUS           | PATHOGENIC                             |
| MYBPC3 + MYH7 | Asp610Asn<br>Arg787His | c.1828G>A<br>c.2360G>A    | VUS           | LIKELY PATHOGENIC<br>LIKELY PATHOGENIC |
| MYH7          | Glu1293Lys             | c.3877G>A                 | VUS           | LIKELY PATHOGENIC                      |
| TNNT2         | Glu83Lys               | c.277G>A                  | VUS           | PATHOGENIC                             |
| TPM1          | Ser252Thr              | c.755G>C                  | VUS           | LIKELY PATHOGENIC                      |
| Titin         | Ile22436del            | c.67308_67310delAAT       | VUS           | VUS                                    |
| MYH7          | Glu374Val              | g.23899001T>A             | VUS           | VUS                                    |
| MYBPC3        | Ala833Val              | c.2498C>T                 | VUS           | BENIGN                                 |
| ANKRD1        | Arg78Ser               | c.234A>T                  | VUS           | LIKELY BENIGN                          |
| MYBPC3        | Trp1086Arg             | c.3256T>C                 | VUS           | VUS                                    |
| MYBPC3 + FLNC | (Arg766Trp)            | c.3815-10T>G<br>c.2296C>T | VUS<br>BENIGN | VUS<br>LIKELY BENIGN                   |
| SOS1          | Ser1096Thr             | c.3286T>A                 | VUS           | LIKELY BENIGN                          |
| TPM1          | Asn202Ser              | c.605A>G                  | VUS           | VUS                                    |
| RAF1          | Met224Arg              | c.671T>G                  | VUS           | VUS                                    |
| MYBPC3        | Trp486Gly              | c.1456T>G                 | VUS           | VUS                                    |
| TTN           | His4271Gln             | c.12813C>A                | VUS           | VUS                                    |
| SOS1          | Val624Phe              | c.1870G>T                 | VUS           | VUS                                    |
| TNNI3         | Pro82Ser               | c.244C>T                  | VUS           | LIKELY BENIGN                          |
| MYBPC3        | Arg1228Cys             | c.3682C>T                 | VUS           | LIKELY BENIGN                          |

*Duplicate variants identified in more than one family removed.*

**Supplementary table 2: Type of genetic testing performed in patients with a childhood diagnosis of hypertrophic cardiomyopathy by era.**

| Year genetic testing performed | Type of genetic testing in those with phenotype |                 | Size of genetic panel in genetic index case |                  |                    |                  |
|--------------------------------|-------------------------------------------------|-----------------|---------------------------------------------|------------------|--------------------|------------------|
|                                | Predictive testing                              | Panel testing   | Sanger sequencing                           | Small NGS panel  | Expanded NGS panel | Unknown size     |
| <b>Pre 2000</b>                | -                                               | -               | -                                           | -                | -                  | -                |
| <b>2001-2005</b>               | 1                                               | 1               | -                                           | 1                | -                  | -                |
| <b>2006-2010</b>               | 4                                               | 5               | 7                                           | 3                | -                  | 2                |
| <b>2011-2015</b>               | -                                               | 1               | 2                                           | 2                | -                  | 1                |
| <b>2016 onwards</b>            | 13                                              | 10              | -                                           | 7                | 9                  | -                |
| <b>Unknown year of testing</b> | 4                                               | -               | -                                           | -                | -                  | 6                |
|                                | <b>*22 (39%)</b>                                | <b>17 (30%)</b> | <b>9 (22.5%)</b>                            | <b>13(32.5%)</b> | <b>9(22.5%)</b>    | <b>9 (22.5%)</b> |

*\*3 patients underwent predictive testing for a previously classified pathogenic variant, which was subsequently re-classified as a VUS*
